# Supplementary figures and images for: A Double-Blind Placebo-Controlled Trial of Fluoxetine for Repetitive Behaviors and Global Severity in Adult Autism Spectrum Disorders
Source: Atypon-hosted journal article supplement (doi:10.1176/appi.ajp.2011.10050764), 2011-12-30

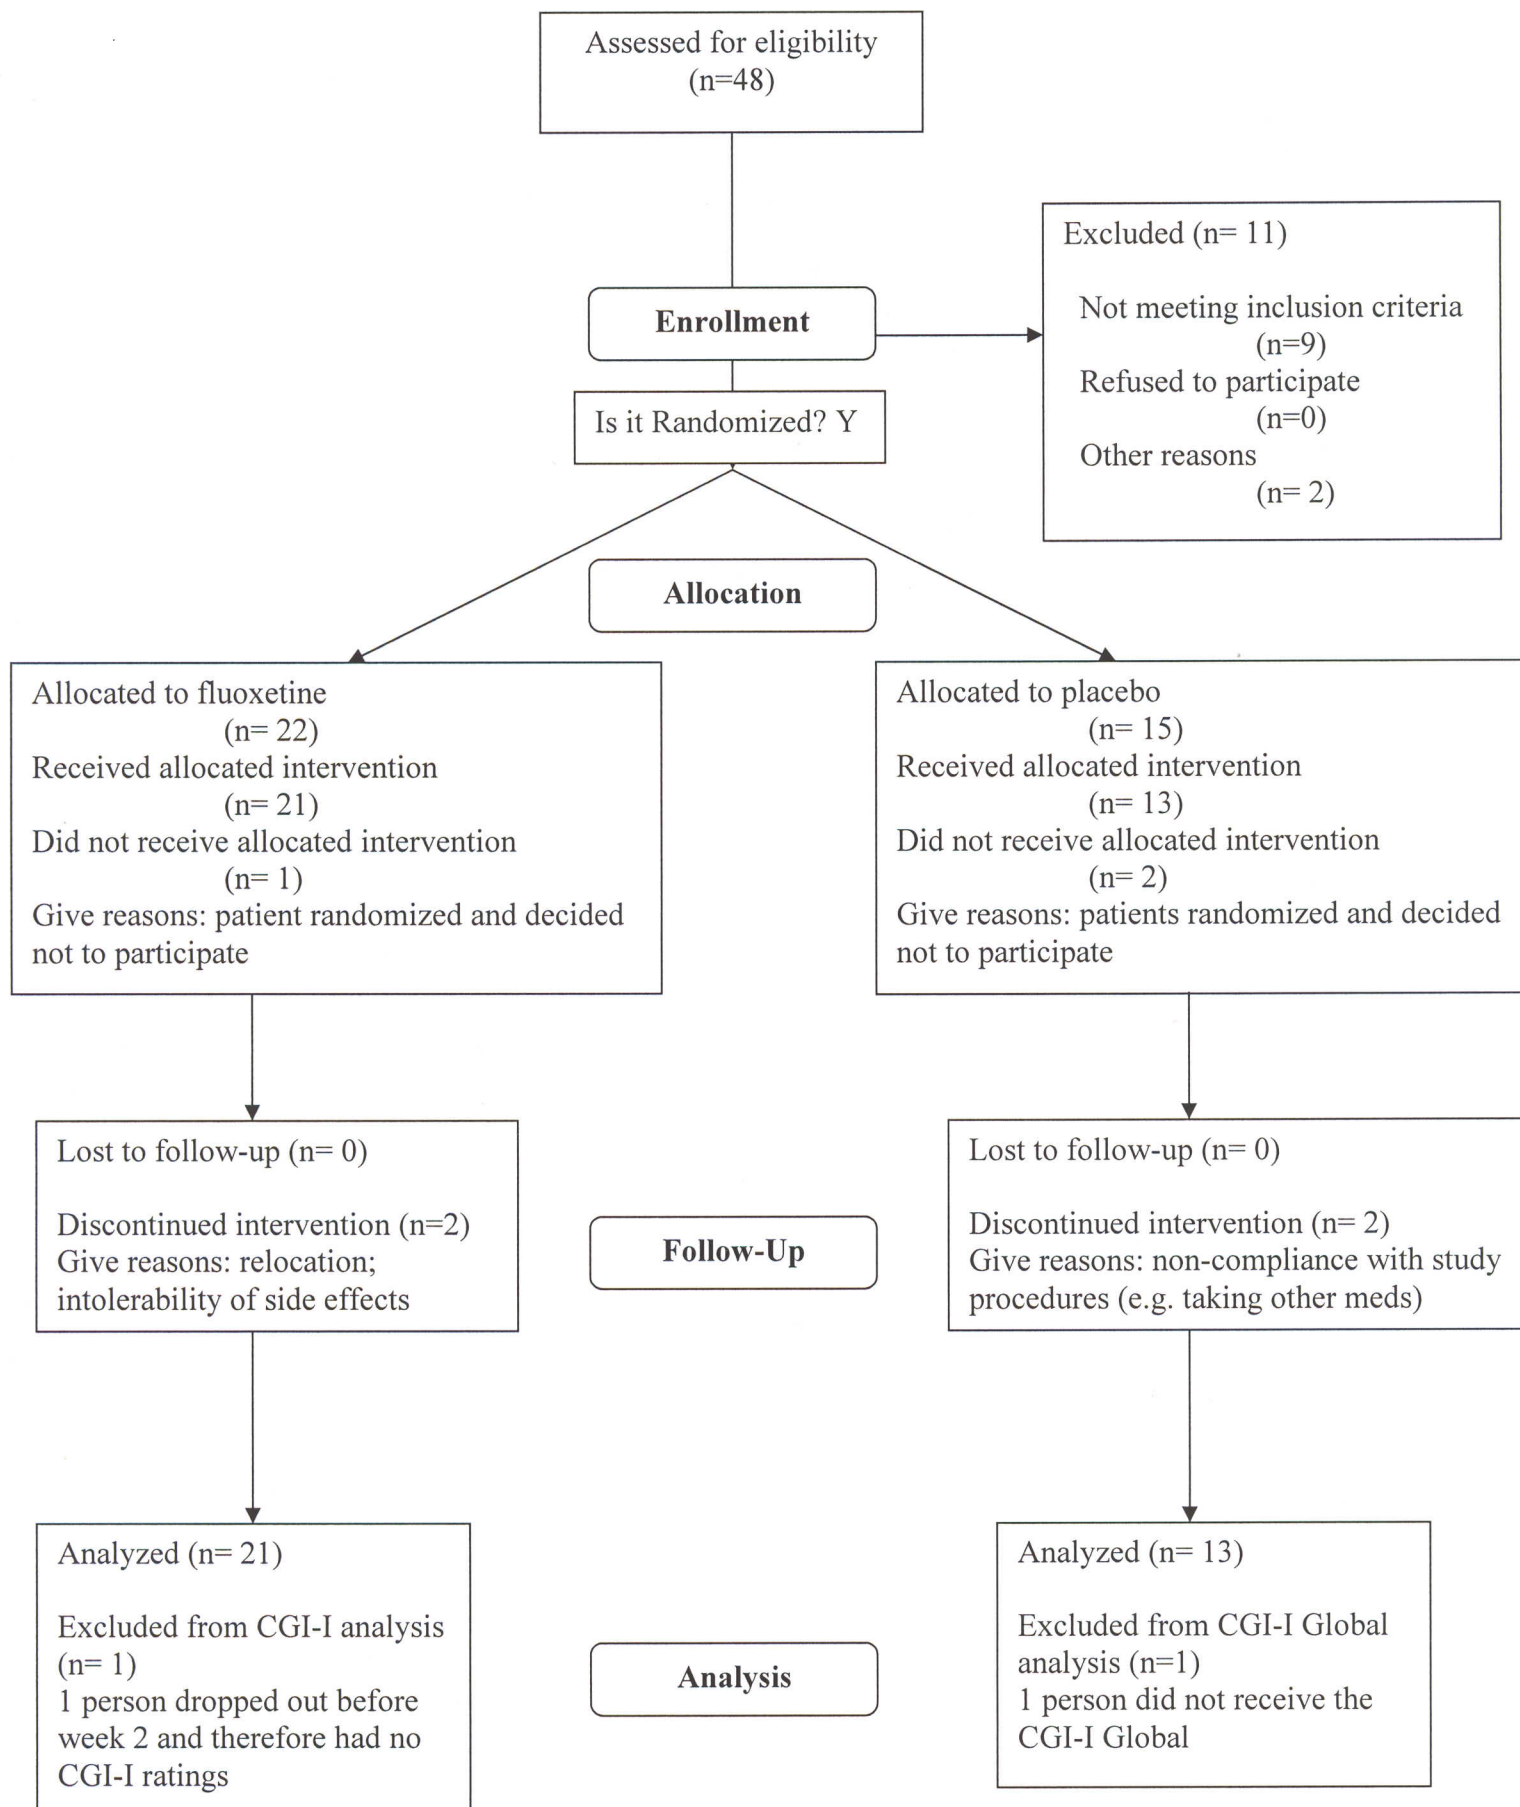

Supplement: appi.ajp.2011.10050764_ds001.pdf [file appi.ajp.2011.10050764_ds001.pdf]
